# Supplementary material for: Multi-component lanthanide hybrids based on zeolite A/L and zeolite A/L-polymers for tunable luminescence
Source: Royal Society of Chemistry journal article supplement (doi:10.1039/c4pp00364k), 2014-11-06
Supplement: c4pp00364k1.pdf [file c4pp00364k1.pdf]

## Electronic Supporting Information

### Multi-component lanthanide hybrids based on zeolite A/L and zeolite A/L-polymer for tunable luminescence

Lei Chen, Bing Yan\*

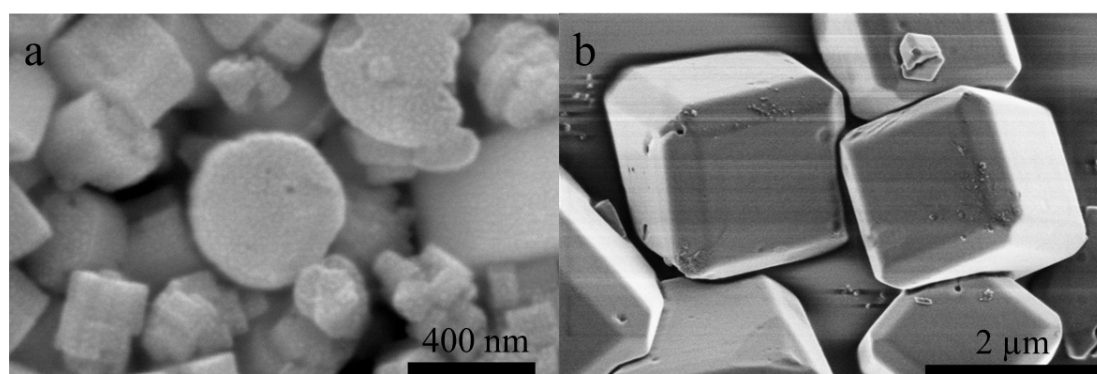

**Figure S1** SEM images of zeolite L crystals (a) and zeolite A crystals (b) prepared in this work.

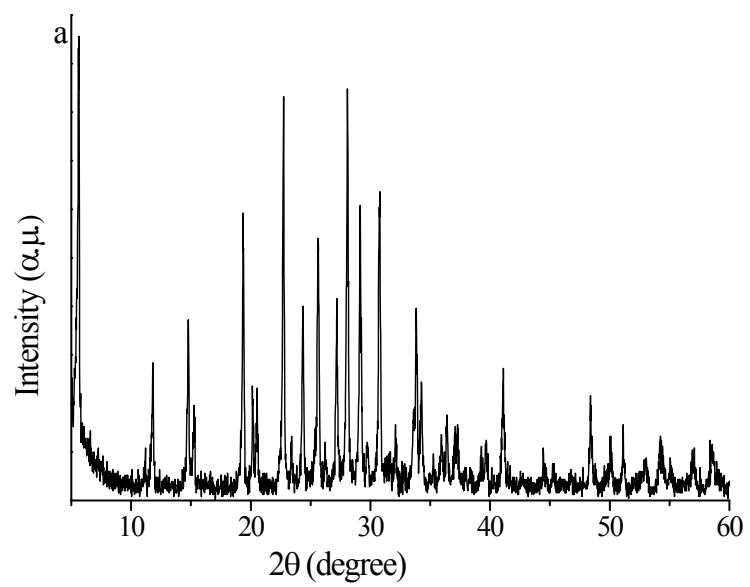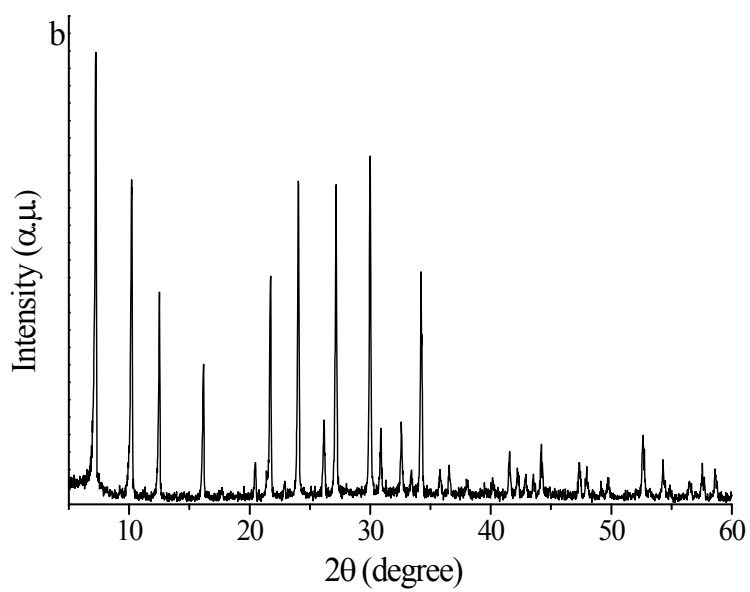

**Figure S2** XRD patterns of the zeolite L (A) and zeolite A (B) synthesized in this work.

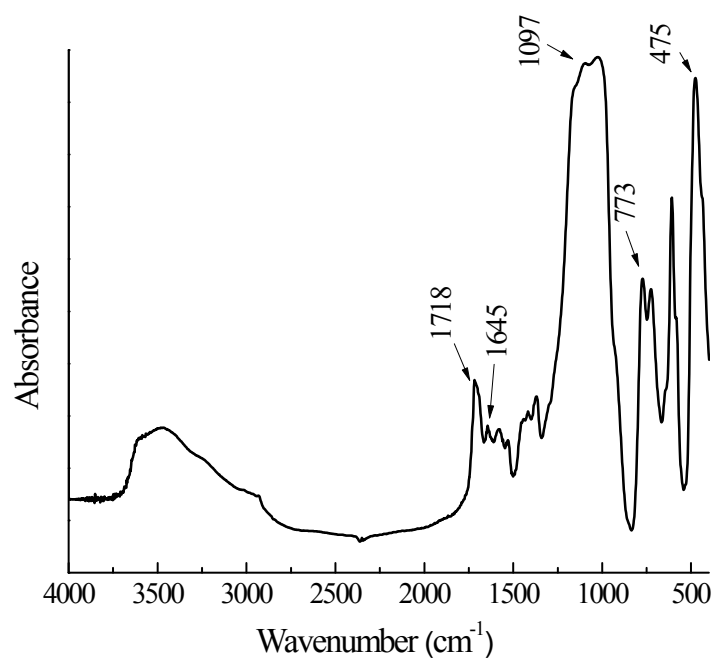

**Figure S3** Selected FT-IR spectra of bipy-Eu-Si-[ZL⊃Tb-AA] hybrids.

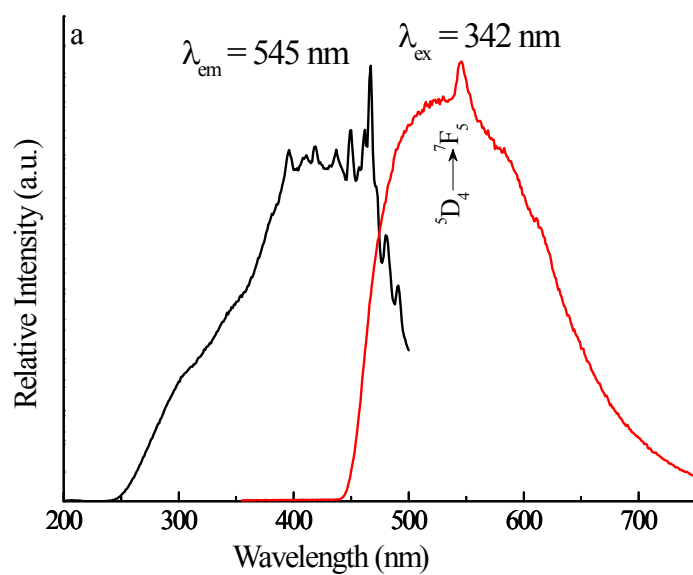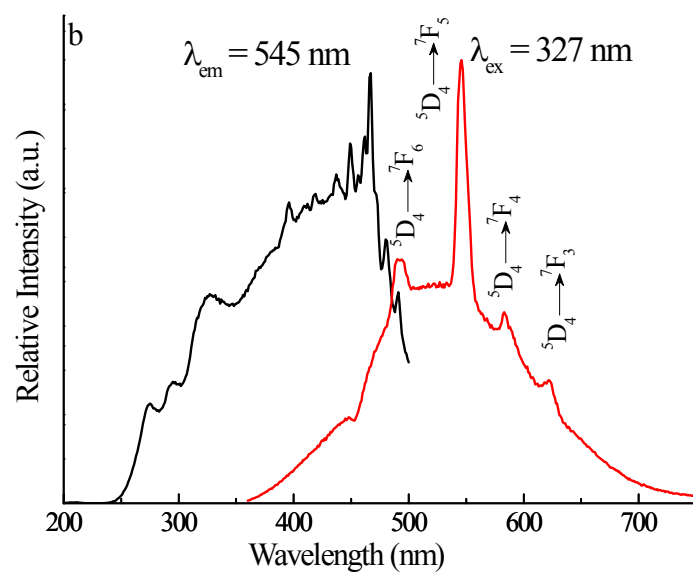

**Figure S4** Luminescence of bipy-Eu-Si-[ZA⊃Tb-AA] (a) and phen-Tb-Si-[ZA⊃Tb-AA] (b). Excitation spectrum was observed at 545 nm; emission spectrum was obtained upon excitation at 342 nm and 327 nm, respectively.

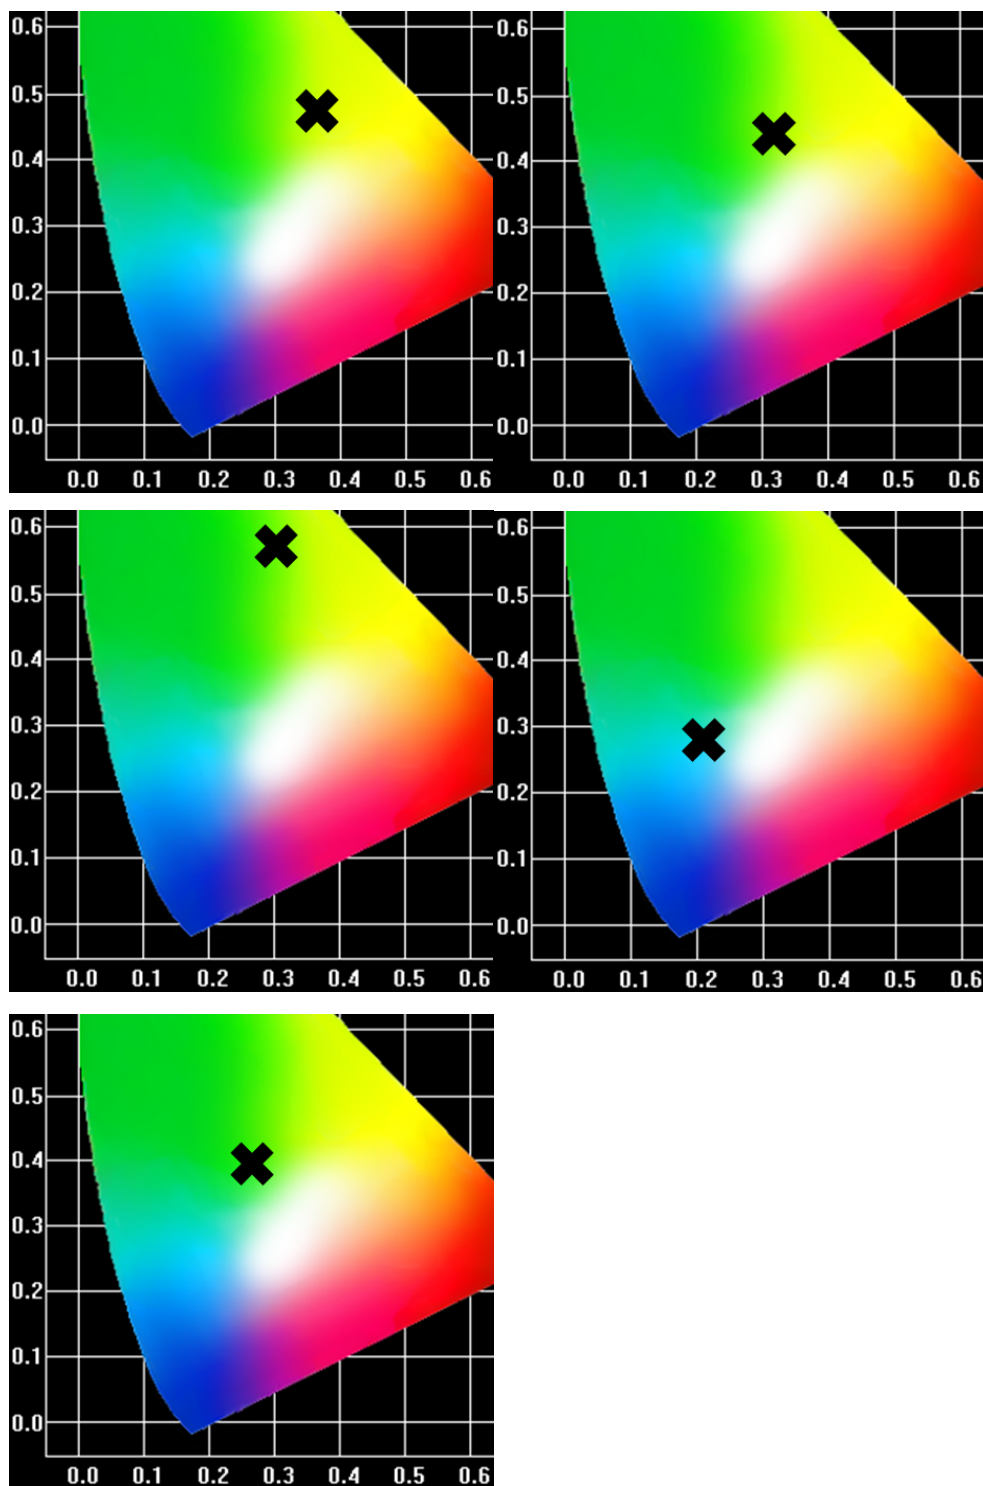

**Figure S4** The selected CIE diagrams for hybrid materials: from left-right, top-bottom a-e: a for bipy-Eu-Si-[ZA $\supset$ Tb-AA] ( $\lambda_{\text{ex}} = 342$  nm), b for phen-Tb-Si-[ZA $\supset$ Tb-AA] ( $\lambda_{\text{ex}} = 327$  nm), c for bipy-Eu-Si-[ZL $\supset$ Tb-AA] ( $\lambda_{\text{ex}} = 301$  nm), d for phen-Tb-Si-[ZL $\supset$ Tb-AA] ( $\lambda_{\text{ex}} = 307$  nm), and e for phen-Tb-Si-[ZA $\supset$ Tb-AA]-PMMA ( $\lambda_{\text{ex}} = 365$  nm).

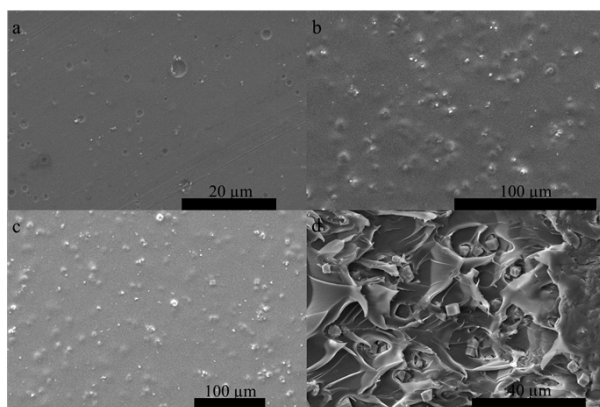

**Figure S6** The selected typical surface SEM images of phen-Tb-Si-[ZL $\supset$ Eu-DBM]-PEMA (a), phen-Tb-Si-[ZA $\supset$ Tb-AA]-PMMA (b), phen-Tb-Si-[ZA $\supset$ Eu-DBM]-PMMA (c) and cross-sectional SEM image of phen-Tb-Si-[ZA $\supset$ Tb-AA]-PMMA (d).

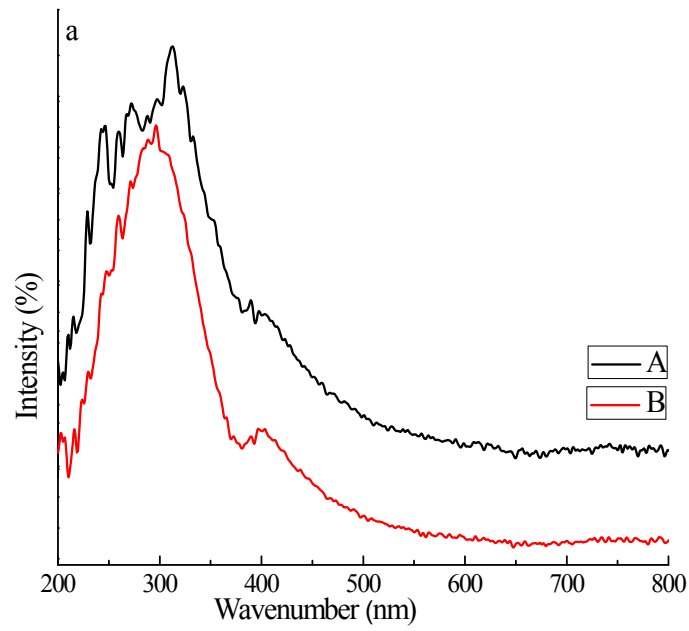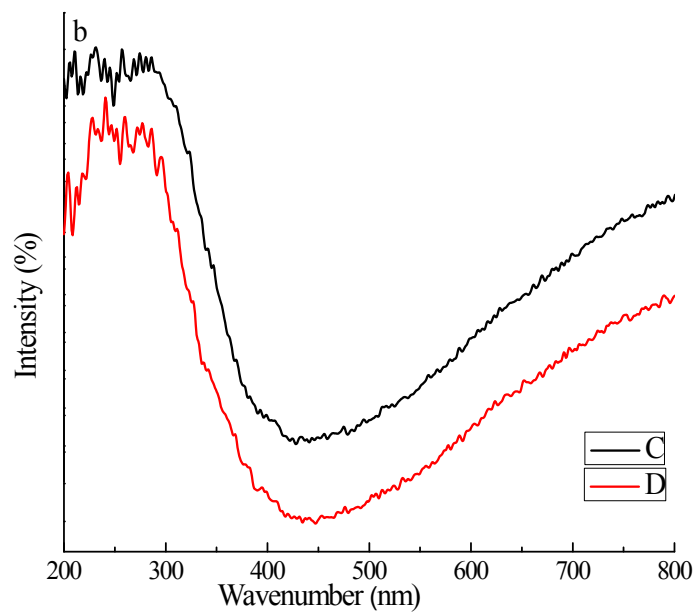

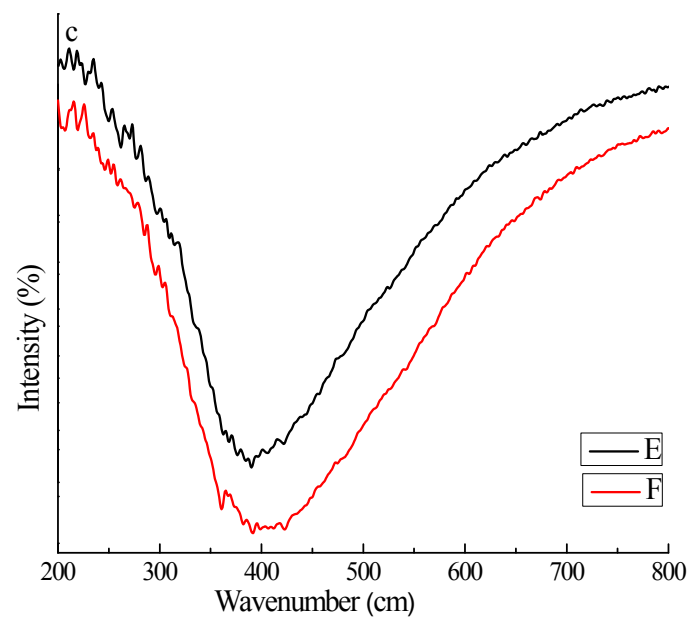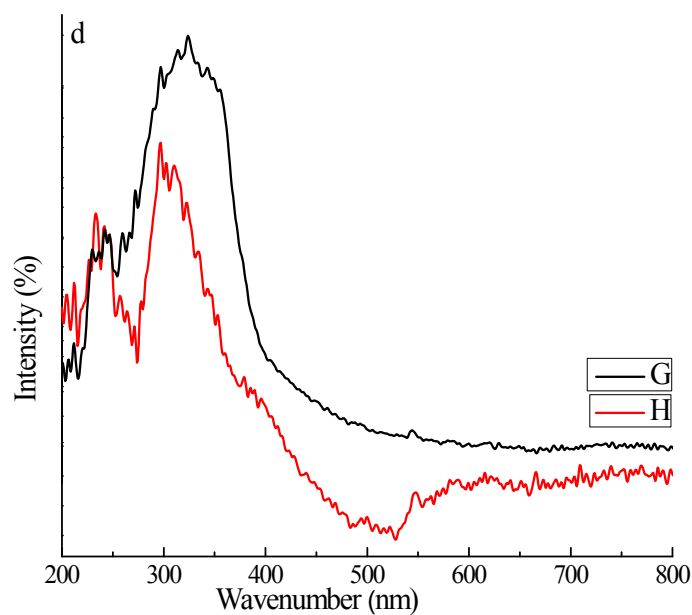

**Figure S7** Ultraviolet-visible diffuse reflective absorption spectra of hybrids with  $\text{Eu}^{3+}$  loaded zeolites A (a) bipy-Eu-Si-[ZA $\supset$ Eu-DBM] (A) and phen-Tb-Si-[ZA $\supset$ Eu-DBM] (B); hybrids with  $\text{Eu}^{3+}$  loaded zeolites L (b) bipy-Tb -Si-[ZL-Eu-DBM] (C) and phen-Eu-Si-[ZL $\supset$ Eu-DBM] (D); hybrids with  $\text{Eu}^{3+}$  loaded zeolites A (c) bipy-Tb-Si-[ZA $\supset$ Tb-AA] (E) and phen-Eu-Si-[ZA $\supset$ Tb-AA] (F); hybrids with  $\text{Tb}^{3+}$  loaded zeolites L (d) bipy-Eu-Si-[ZL $\supset$ Tb-AA] (G) and phen-Tb-Si-[ZL $\supset$ Tb-AA] (H).
